# Supplementary material for: The Krüppel-Like Factor Gene Target Dusp14 Regulates Axon Growth and Regeneration
Source: PubMed Central journal article supplement — Invest Ophthalmol Vis Sci. 2018 Jun;59(7):2736–47. doi: 10.1167/iovs.17-23319 (PMC5983061; doi:10.1167/iovs.17-23319), 2018-06
Supplement: iovs-59-05-42_s01.pdf [file iovs-59-05-42_s01.pdf]

## **Supplementary files**

### **Supplementary Figure 1. Intersample variability in microarray after viral transduction**

**of KLFs.** Intersample variability amongst the biological replicates was very low in each of the KLF-transduced RGC groups. Shown here are examples of the first two samples from each group analyzed.

### **Supplementary Table 1. Regulation of KLFs by other KLF family members.**

Fold change comparison between KLF family members and axon growth regulators KLF9 (repressor), KLF16 (repressor), KLF7 (promoter) and KLF11 (none).

### **Supplementary Table 2. Target candidate probes satisfying all of screening criteria.**

Fold change comparison between candidate probes and KLF9 (repressor), KLF16 (repressor), KLF7 (promoter) and KLF11 (none).

# Extended Data Figure 1

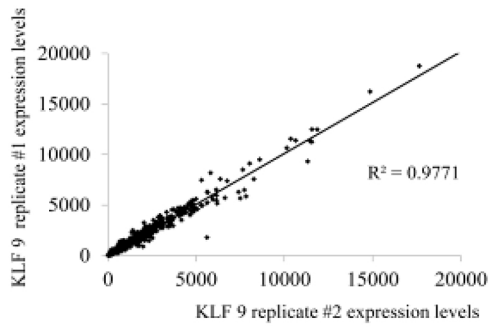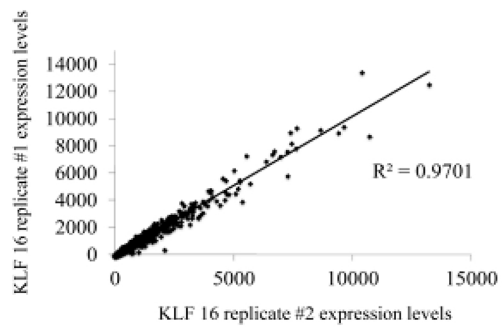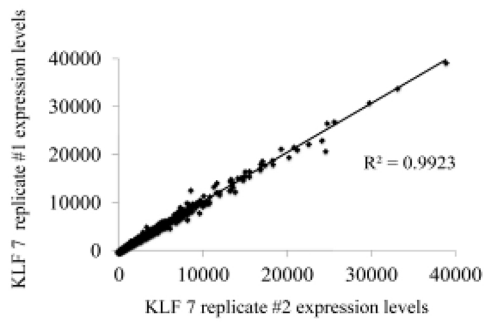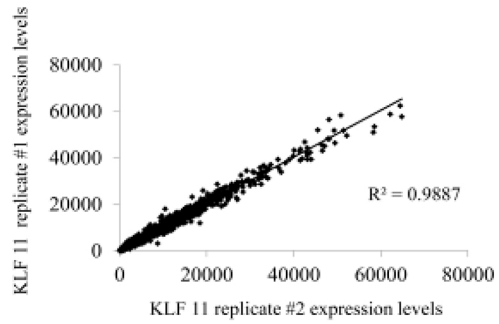

**Extended Data Table 1. Regulation of KLFs by other KLF family members.**

| Probe ID     | Gene Symbol | FC by KLF9 | FC by KLF16 | FC by KLF7 | FC by KLF11 | Effect on Axon Growth* | KLF Family*                          |
|--------------|-------------|------------|-------------|------------|-------------|------------------------|--------------------------------------|
| 1382033_at   | Klf1        | 3.13       | 1.00        | 1.00       | 1.00        | Repressor              | Acidic and Inhibitory domains        |
| 1375248_at   | Klf2        | 1.00       | 1.00        | 1.00       | 1.00        | Repressor              | Acidic and Inhibitory domains        |
| 1376569_at   | Klf2        | 1.82       | 1.00        | -7.36      | 1.00        | Repressor              | Acidic and Inhibitory domains        |
| 1386040_at   | Klf2        | 1.00       | 1.00        | 1.00       | 1.00        | Repressor              | Acidic and Inhibitory domains        |
| 1386041_a_at | Klf2        | 1.00       | 1.00        | 1.00       | 1.00        | Repressor              | Acidic and Inhibitory domains        |
| 1394068_x_at | Klf2        | 1.00       | 1.00        | 1.00       | 1.00        | Repressor              | Acidic and Inhibitory domains        |
| 1387260_at   | Klf4        | 1.77       | 1.00        | 1.00       | 1.00        | Repressor              | Acidic and Inhibitory domains        |
| 1375177_at   | Klf13       | 1.00       | 1.00        | 1.00       | 1.00        | Repressor              | BTEB                                 |
| 1383013_at   | Klf13       | -21.44     | -3.22       | 1.82       | 1.00        | Repressor              | BTEB                                 |
| 1374231_at   | Klf16       | -1.38      | 1.00        | 4.32       | 1.00        | Repressor              | BTEB                                 |
| 1370209_at   | Klf9        | -1.62      | 1.00        | 1.00       | 1.00        | Repressor              | BTEB                                 |
| 1387882_at   | Klf9        | 1.00       | 1.00        | 1.00       | 1.00        | Repressor              | BTEB                                 |
| 1368249_at   | Klf15       | 7.09       | 2.60        | 1.00       | 1.00        | Repressor              | grey group in Science paper*         |
| 1381395_at   | Klf15       | 1.00       | 1.00        | 1.00       | 1.00        | Repressor              | grey group in Science paper*         |
| 1381396_s_at | Klf15       | 1.00       | 1.00        | 1.00       | 1.00        | Repressor              | grey group in Science paper*         |
| 1368363_at   | Klf5        | 3.24       | 1.00        | 1.00       | 1.00        | Repressor              | grey group in Science paper*         |
| 1385961_at   | Klf5        | 1.00       | 1.00        | 1.00       | 1.00        | Repressor              | grey group in Science paper*         |
| 1394039_at   | Klf5        | 1.92       | 1.00        | 1.00       | 1.56        | Repressor              | grey group in Science paper*         |
| 1398159_at   | Klf5        | 1.00       | 1.00        | 1.00       | 1.00        | Repressor              | grey group in Science paper*         |
| 1387060_at   | Klf6        | 1.37       | 1.00        | -1.69      | 1.00        | Promoter               | Acidic and Hydrophobic S-rich domain |
| 1377618_at   | Klf7        | 1.00       | 1.00        | 1.00       | 1.00        | Promoter               | Acidic and Hydrophobic S-rich domain |
| 1380363_at   | Klf7        | 1.00       | 1.00        | 4.08       | 1.00        | Promoter               | Acidic and Hydrophobic S-rich domain |
| 1384497_at   | Klf7        | 1.00       | 1.00        | 1.00       | 1.00        | Promoter               | Acidic and Hydrophobic S-rich domain |
| 1391471_at   | Klf7        | 1.00       | 1.00        | 1.00       | 1.00        | Promoter               | Acidic and Hydrophobic S-rich domain |
| 1385545_at   | Klf12       | 1.00       | 1.00        | 1.00       | 1.00        | None                   | PVALS/T                              |
| 1378332_at   | Klf3        | 1.00       | 1.00        | 2.06       | 1.00        | None                   | PVALS/T                              |
| 1389479_at   | Klf3        | 1.00       | 1.00        | 1.84       | 1.00        | None                   | PVALS/T                              |
| 1393150_at   | Klf3        | 1.00       | 1.00        | 2.33       | 1.00        | None                   | PVALS/T                              |
| 1368650_at   | Klf10       | -1.61      | 1.00        | 4.10       | -8.31       | None                   | TIEG                                 |

FC, fold-change. \*As described in Moore DL, et al., Science (2009)<sup>10</sup>

**Extended Data Table 2. Target candidate probes satisfied all of screening criteria.**

| Probe ID   | Gene Symbol | FC in KLF9 | FC in KLF16 | FC in KLF7 | FC in KLF11 | Corrected p-value |
|------------|-------------|------------|-------------|------------|-------------|-------------------|
| 1381246_at | Rn.109718   | 9.4144     | 3.8510      | -2.5461    | 1.0000      | 0.0126            |
| 1390119_at | Sfrp2       | 9.0695     | 3.7613      | -2.7319    | 1.0000      | 0.0356            |
| 1374971_at | Rn.16576    | 7.5644     | 3.1264      | -2.3583    | 1.0000      | 0.0457            |
| 1390219_at | Wdr19       | 6.5807     | 2.4275      | -1.4894    | 1.0000      | 0.0001            |
| 1383541_at | Nagpa       | 6.1758     | 2.8520      | -1.1003    | 1.0000      | <0.0001           |
| 1377789_at | Rn.13199    | 6.0207     | 3.0021      | -2.2092    | 1.0000      | 0.0121            |
| 1383380_at | Rpp38       | 5.5618     | 2.7613      | -2.2113    | 1.0000      | 0.0169            |
| 1391125_at | Ap1s3       | 5.4617     | 2.6528      | -1.9369    | 1.0000      | 0.0296            |
| 1374759_at | Galnt1      | 5.4034     | 3.1317      | -2.1237    | 1.0000      | 0.0146            |
| 1383661_at | Rn.15645    | 4.8578     | 2.2618      | -1.9907    | 1.0000      | 0.0406            |
| 1395518_at | Rn.34553    | 4.8344     | 2.1367      | -2.9538    | 1.0000      | 0.0280            |
| 1388744_at | Mcm7        | 4.2993     | 3.0345      | -1.9648    | 1.0000      | 0.0139            |
| 1389385_at | B9d1        | 4.2060     | 1.7928      | -1.4715    | 1.0000      | <0.0001           |
| 1394472_at | Rgl1        | 3.9394     | 2.3532      | -2.0787    | 1.0000      | 0.0402            |
| 1368045_at | Slc31a1     | 3.9002     | 2.0903      | -1.4042    | 1.0000      | <0.0001           |
| 1389137_at | Cit         | 3.6013     | 2.5055      | -2.7198    | 1.0000      | 0.0463            |
| 1389729_at | Rilpl2      | 3.4976     | 1.8876      | -1.6979    | 1.0000      | 0.0331            |
| 1393743_at | Rn.34553    | 3.4666     | 2.0048      | -3.9919    | 1.0000      | 0.0046            |
| 1369989_at | Pnpo        | 3.3757     | 2.4578      | -1.4789    | 1.0000      | <0.0001           |
| 1388534_at | Rn.95113    | 3.2356     | 1.9669      | -1.4933    | 1.0000      | <0.0001           |
| 1373324_at | Dusp14      | 3.2327     | 2.0832      | -1.6994    | 1.0000      | 0.0120            |
| 1376989_at | Rn.14653    | 3.2270     | 2.3526      | -2.2980    | 1.0000      | 0.0022            |
| 1381984_at | Rn.24648    | 3.2057     | 1.8007      | -1.2260    | 1.0000      | <0.0001           |
| 1387966_at | Asrgl1      | 3.1794     | 1.6783      | -1.5482    | 1.0000      | 0.0215            |
| 1384025_at | Rn.7560     | 3.0945     | 2.4931      | -1.4680    | 1.0000      | <0.0001           |
| 1388699_at | Man2b1      | 3.0514     | 1.6837      | -1.5840    | 1.0000      | 0.0221            |
| 1375932_at | Rn.163618   | 3.0438     | 1.5543      | -2.2797    | 1.0000      | 0.0159            |

FC, fold-change.
